# Supplementary material for: Lack of Effect of Oral Sulforaphane Administration on Nrf2 Expression in COPD: A Randomized, Double-Blind, Placebo Controlled Trial
Source: PubMed Central journal article supplement (PMC5104323; doi:10.1371/journal.pone.0163716), 2016-11-10
Supplement: pone.0163716.s005.pdf [file pone.0163716.s005.pdf]

**S2 Table: Pulmonary function measures, change from baseline to 4 weeks by treatment assignment**

|                                       | <i>Sulforaphane Dose Group</i>      |                            |                             | <i>P-value*</i> |
|---------------------------------------|-------------------------------------|----------------------------|-----------------------------|-----------------|
|                                       | <i>Placebo</i><br><i>N=30</i>       | <i>25μM</i><br><i>N=29</i> | <i>150μM</i><br><i>N=29</i> |                 |
|                                       | <i>Median (Interquartile Range)</i> |                            |                             |                 |
| Post bronchodilator FEV1 (%predicted) | -1 (-4, 5)                          | 1 (-4, 4)                  | 1 (-4, 3)                   | 0.83            |
| Post bronchodilator FEV1/FVC ratio    | -0.00 (-0.02, 0.02)                 | 0.01 (-0.02, 0.02)         | -0.00 (-0.03, 0.01)         | 0.71            |
| DLCO (mL/mm/mmHg)                     | -0.2 (-1.8, 1.6)                    | -0.2 (-1.6, 1.9)           | 0.0 (-1.3, 1.1)             | 0.96            |
| TLC (Liters)                          | -0.0 (-0.4, 0.2)                    | 0.0 (-0.4, 0.2)            | 0.0 (-0.3, 0.3)             | 0.96            |
| SVC (Liters)                          | 0.1 (-0.3, 0.3)                     | 0.0 (-0.3, 0.2)            | 0.0 (-0.3, 0.2)             | 0.78            |
| FRC (Liters)                          | 0.0 (-0.3, 0.2)                     | -0.0 (-0.2, 0.3)           | 0.0 (-0.1, 0.3)             | 0.66            |
| RV (Liters)                           | -0.1 (-0.3, 0.2)                    | -0.1 (-0.4, 0.3)           | 0.1 (-0.4, 0.3)             | 0.81            |

Abbreviations: FEV1=forced expiratory volume in 1 second; FVC=forced vital capacity; DLCO=diffusing capacity; TLC=total lung capacity; SVC=slow vital capacity; FRC=forced residual capacity; RV =residual volume

\*Kruskal-Wallis test
