# Supplementary material for: Lack of Effect of Oral Sulforaphane Administration on Nrf2 Expression in COPD: A Randomized, Double-Blind, Placebo Controlled Trial
Source: PubMed Central journal article supplement (PMC5104323; doi:10.1371/journal.pone.0163716), 2016-11-10
Supplement: pone.0163716.s006.pdf [file pone.0163716.s006.pdf]

**S3 Table: Dyspnea and St. George Respiratory Questionnaire Scores, change from baseline at 4 weeks by treatment assignment**

|                                           | <i>Sulforaphane Dose Group</i>             |                            |                             | <i>P-value*</i> |
|-------------------------------------------|--------------------------------------------|----------------------------|-----------------------------|-----------------|
|                                           | <i>Placebo</i><br><i>N=30</i>              | <i>25μM</i><br><i>N=29</i> | <i>150μM</i><br><i>N=29</i> |                 |
|                                           | <b><i>Median (Interquartile Range)</i></b> |                            |                             |                 |
| Medical Research Council<br>Dyspnea Score | 0.0 (0.0,0.0)                              | 0.0 (-1.0,0.0)             | 0.0 (0.0,1.0)               | 0.01            |
| St. George's Respiratory Questionnaire    |                                            |                            |                             |                 |
| Total score                               | -1.3 (-7.4,0.8)                            | 1.0 (-4.1,3.8)             | -3.5 (-6.6,1.8)             | 0.37            |
| Symptoms                                  | -1.1 (-9.4,4.5)                            | -1.6 (-12.1,6.2)           | 0.0 (-11.2,7.9)             | 0.88            |
| Activity                                  | 0.0 (-12.7,6.7)                            | 0.0 (-6.1,6.7)             | 0.0 (-6.3,6.6)              | 0.88            |
| Impacts                                   | -2.5 (-7.3,1.5)                            | 1.9 (-3.9,7.2)             | -1.9 (-6.9,3.5)             | 0.25            |

\*Kruskal-Wallis test
