# Supplementary material for: Lack of Effect of Oral Sulforaphane Administration on Nrf2 Expression in COPD: A Randomized, Double-Blind, Placebo Controlled Trial
Source: PubMed Central journal article supplement (PMC5104323; doi:10.1371/journal.pone.0163716), 2016-11-10
Supplement: pone.0163716.s007.pdf [file pone.0163716.s007.pdf]

**S4 Table: Treatment-emergent† symptoms during follow-up by treatment group**

| <i>Symptom</i>        | <i>Sulforaphane Dose Group</i> |                      |                       | <i>P-value*</i> |
|-----------------------|--------------------------------|----------------------|-----------------------|-----------------|
|                       | <i>Placebo<br/>N=31</i>        | <i>25µM<br/>N=29</i> | <i>150µM<br/>N=29</i> |                 |
|                       | <i>N (%)</i>                   |                      |                       |                 |
| Nausea                | 1 (3%)                         | 2 (7%)               | 6 (21%)               | 0.09            |
| Vomiting              | 0 (0%)                         | 1 (3%)               | 0 (0%)                | 0.66            |
| Poor appetite         | 1 (3%)                         | 2 (7%)               | 2 (7%)                | 0.74            |
| Bad taste in mouth    | 2 (7%)                         | 7 (24%)              | 9 (31%)               | 0.05            |
| Heartburn             | 1 (3%)                         | 6 (21%)              | 7 (24%)               | 0.06            |
| Headache              | 2 (7%)                         | 2 (7%)               | 1 (3%)                | 1.00            |
| Fatigue               | 3 (10%)                        | 5 (17%)              | 2 (7%)                | 0.50            |
| Skin rash             | 1 (3%)                         | 2 (7%)               | 1 (3%)                | 0.84            |
| Bloating/gas          | 5 (17%)                        | 7 (24%)              | 6 (21%)               | 0.76            |
| Diarrhea              | 2 (7%)                         | 3 (10%)              | 2 (7%)                | 0.89            |
| Abdominal discomfort  | 1 (3%)                         | 3 (10%)              | 6 (21%)               | 0.09            |
| Respiratory infection | 1 (3%)                         | 1 (3%)               | 1 (3%)                | 1.00            |
| Chest pain            | 0 (0%)                         | 2 (7%)               | 0 (0%)                | 0.21            |
| Constipation          | 0 (0%)                         | 1 (3%)               | 1 (3%)                | 0.55            |
| Increased phlegm      | 1 (3%)                         | 0 (0%)               | 1 (3%)                | 1.00            |
| Leg pain              | 0 (0%)                         | 1 (3%)               | 1 (3%)                | 0.55            |
| Shortness of breath   | 0 (0%)                         | 1 (3%)               | 1 (3%)                | 0.55            |
| Other                 | 4 (13%)                        | 4 (14%)              | 0 (0%)                | 0.12            |

\* P-value from Fisher's Exact test

†Emergent (new) symptoms reported as mild, moderate, or severe during the 4 weeks of follow-up.

Only bad taste (n=1) and heartburn (n=1) were characterized as severe.
