# Supplementary material for: Lack of Effect of Oral Sulforaphane Administration on Nrf2 Expression in COPD: A Randomized, Double-Blind, Placebo Controlled Trial
Source: PLoS One. 2016 Nov 10;11(11):e0163716. doi: 10.1371/journal.pone.0163716 (PMC5104323; doi:10.1371/journal.pone.0163716)
Supplement: S1 Table — (PDF) [file pone.0163716.s004.pdf]

**S1 Table: Hematology and serum chemistry at baseline and change after 4 weeks by treatment assignment**

|                                               | <i>Sulforaphane Dose Group</i>      |                            |                            | <i>P-value*</i> |
|-----------------------------------------------|-------------------------------------|----------------------------|----------------------------|-----------------|
|                                               | <i>Placebo</i><br><i>N=30</i>       | <i>25μM</i><br><i>N=29</i> | <i>150μ</i><br><i>N=29</i> |                 |
|                                               | <i>Median (Interquartile Range)</i> |                            |                            |                 |
| Hemoglobin (g/dL)                             |                                     |                            |                            |                 |
| Baseline                                      | 14.9 (13.0,15.4)                    | 14.9 (14.1,15.6)           | 14.3 (13.5,14.9)           |                 |
| Change from baseline                          | 0.0 (-0.4,0.6)                      | 0.0 (-0.5,0.2)             | -0.1 (-0.4,0.4)            | 0.68            |
| Hematocrit (%)                                |                                     |                            |                            |                 |
| Baseline                                      | 44 (39,44)                          | 44 (42,46)                 | 42 (41,44)                 |                 |
| Change from baseline                          | 0 (-1,2)                            | -0 (-2,1)                  | -0 (-1,2)                  | 0.41            |
| White blood cell count (x10 <sup>4</sup> /mL) |                                     |                            |                            |                 |
| Baseline                                      | 0.7 (0.5,0.9)                       | 0.7 (0.6,0.8)              | 0.6 (0.5,0.7)              |                 |
| Change from baseline                          | 0.0 (-0.2,0.0)                      | 0.0 (-0.1,0.0)             | 0.0 (-0.1,0.1)             | 0.45            |
| Thyroid stimulating hormone (μ U/mL)          |                                     |                            |                            |                 |
| Baseline                                      | 1.1 (0.7,1.6)                       | 1.2 (0.5,1.6)              | 1.1 (0.8,1.7)              |                 |
| Change from baseline                          | 0.0 (-0.4,0.3)                      | 0.0 (-0.2,0.1)             | 0.1 (-0.3,0.6)             | 0.46            |
| Aspartate transaminase (AST) (U/L)            |                                     |                            |                            |                 |
| Baseline                                      | 19 (17,23)                          | 20 (15,29)                 | 21 (18,29)                 |                 |
| Change from baseline                          | 0 (-2,5)                            | -2 (-3,2)                  | 0 (-3,2)                   | 0.48            |
| Alanine transaminase (ALT) (U/L)              |                                     |                            |                            |                 |
| Baseline                                      | 19 (15,26)                          | 24 (18,31)                 | 21 (18,32)                 |                 |
| Change from baseline                          | 0 (-1,3)                            | 0 (-5,1)                   | 1 (-4,4)                   | 0.28            |
| Alkaline phosphatase (U/L)                    |                                     |                            |                            |                 |
| Baseline                                      | 84 (72,90)                          | 75 (68,93)                 | 77 (66,87)                 |                 |
| Change from baseline                          | 2 (-6,7)                            | -2 (-5,4)                  | -2 (-6,8)                  | 0.82            |
| Creatinine (mg/dL)                            |                                     |                            |                            |                 |
| Baseline                                      | 0.80 (0.80,1.00)                    | 1.00 (0.70,1.00)           | 0.90 (0.80,1.10)           |                 |
| Change from baseline                          | 0.00 (0.00,0.10)                    | 0.00 (-0.10,0.10)          | 0.10 (-0.10,0.10)          | 0.47            |

\*Kruskal-Wallis test
